# Supplementary material
Source: PubMed Central journal article supplement (PMC3910819)
Supplement: AAC.01830-13_zac002142557so1.pdf [file AAC.01830-13_zac002142557so1.pdf]

**Supplementary Figures S1- S3 for**

**Cadazolid, a New Antibiotic for the Treatment of *Clostridium difficile*  
Infections: *In Vitro* and *in Vivo* Antibacterial Evaluation**

**Authors:** Hans H. Locher<sup>1#</sup>, Peter Seiler<sup>1</sup>, Xinhua Chen<sup>2</sup>, Susanne Schroeder<sup>1</sup>,  
Philippe Pfaff<sup>1</sup>, Michel Enderlin<sup>1</sup>, Axel Klenk<sup>1</sup>, Elvire Fournier<sup>1</sup>, Christian  
Hubschwerlen<sup>1</sup>, Daniel Ritz<sup>1</sup>, Ciaran P. Kelly<sup>2</sup>, Wolfgang Keck<sup>1</sup>

**Affiliations:** <sup>1</sup> Actelion Pharmaceuticals Ltd, Allschwil, Switzerland. <sup>2</sup>Department of  
Medicine, Division of Gastroenterology, Beth Israel Deaconess Medical Center,  
Harvard Medical School, Boston, MA, USA

**#Correspondence:** Hans H. Locher

Actelion Pharmaceuticals Ltd

Gewerbestrasse 16

CH-4123 Allschwil

Switzerland

FAX : +41 61 565 80 90

E-mail : [hans.locher@actelion.com](mailto:hans.locher@actelion.com)

FIG. S1

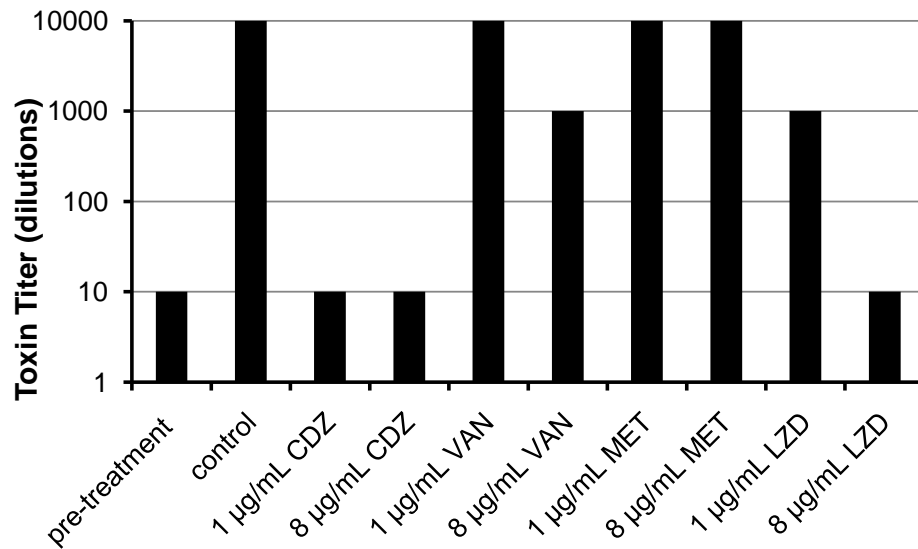

FIG. S1. Effect of antibacterial treatment on cytotoxin formation in stationary phase cultures of hyper virulent *C. difficile* NCTC 13366. High-density stationary phase cultures were treated with supra-MIC concentrations for 5 days and cytotoxin in culture supernatants was measured by a cell-rounding assay using CHO cells. Toxin content was quantified by titration (10-fold dilutions) and toxin titer was defined as the highest dilution resulting in > 90% cell rounding (Barc, MC, Depitre G, Corthier A, Collignon W, Su J, and Bourlioux P. Effects of antibiotics and other drugs on toxin production in *Clostridium difficile* *in vitro* and *in vivo*. Antimicrob Agents Chemother, 1992; 36, 1332-5.). Assays were done in duplicates with identical results. Abbreviations: CDZ, cadazolid; VAN, vancomycin; MET, metronidazole; LZD, linezolid.

FIG. S2

A.

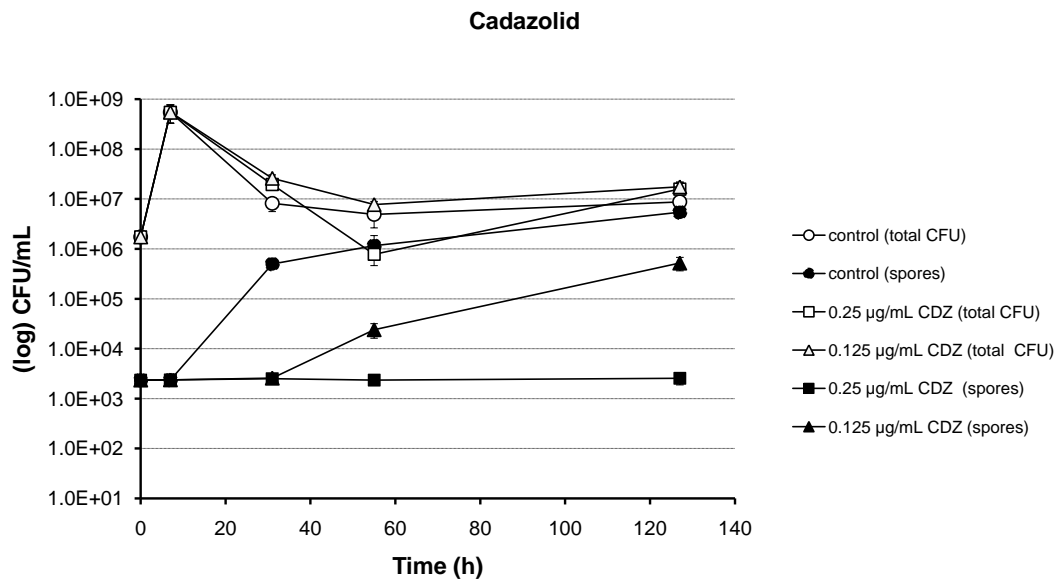

B.

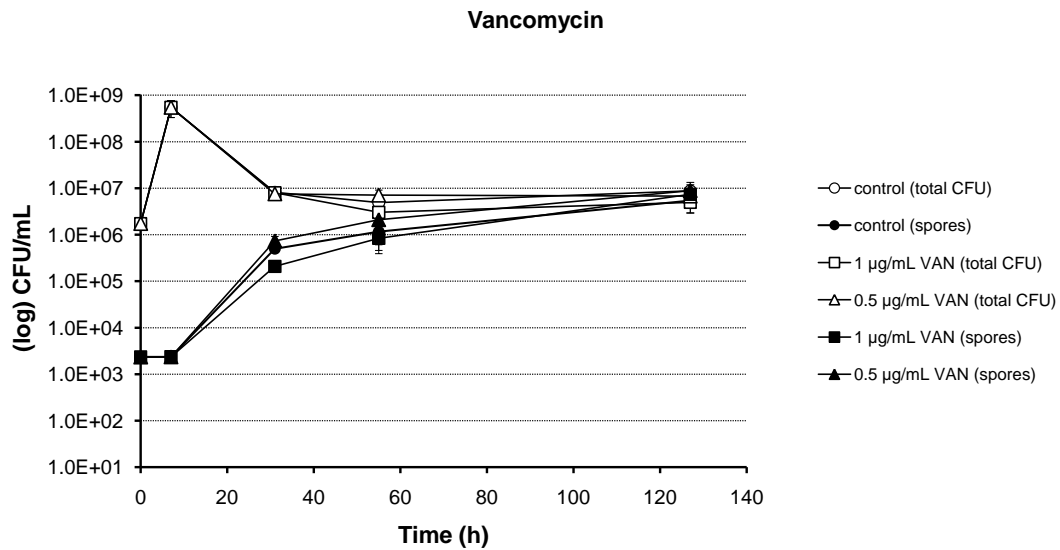

FIG. S2. Effect of sub-growth inhibitory concentrations of cadazolid (A) and vancomycin (B) on spore formation in *C. difficile* NCTC 13366. Antibiotics were added to late-exponential cultures ( $t=6$  hours) at concentrations representing 0.5 and 1x the agar dilution MIC. Controls received no antibiotics. Total viable cells and spores (after ethanol treatment) were enumerated by colony counting. Abbreviations: CDZ, cadazolid; VAN, Vancomycin

Fig. S3

A

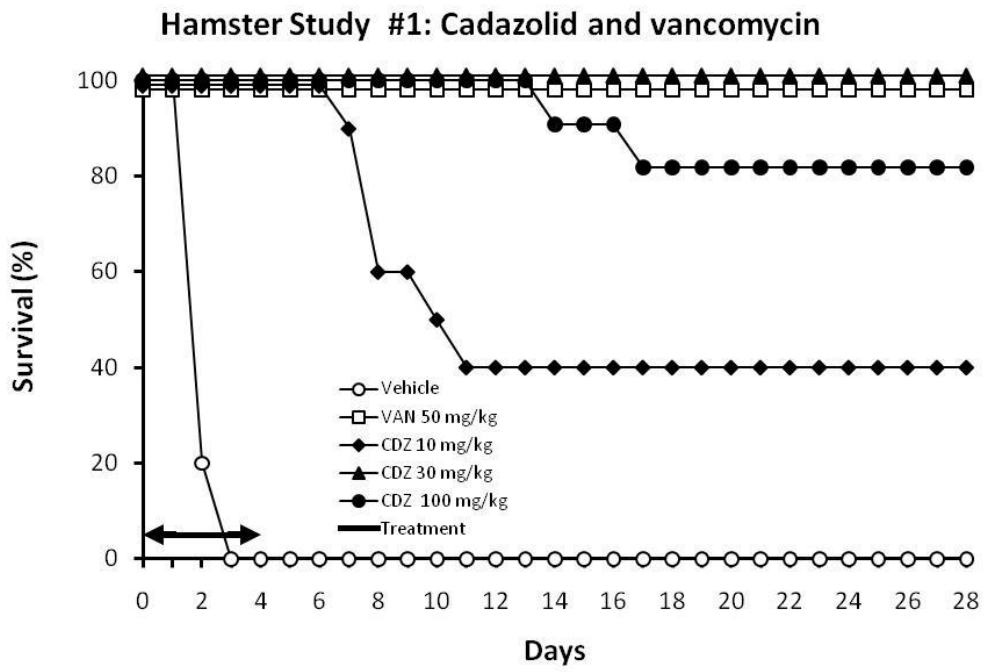

**B**

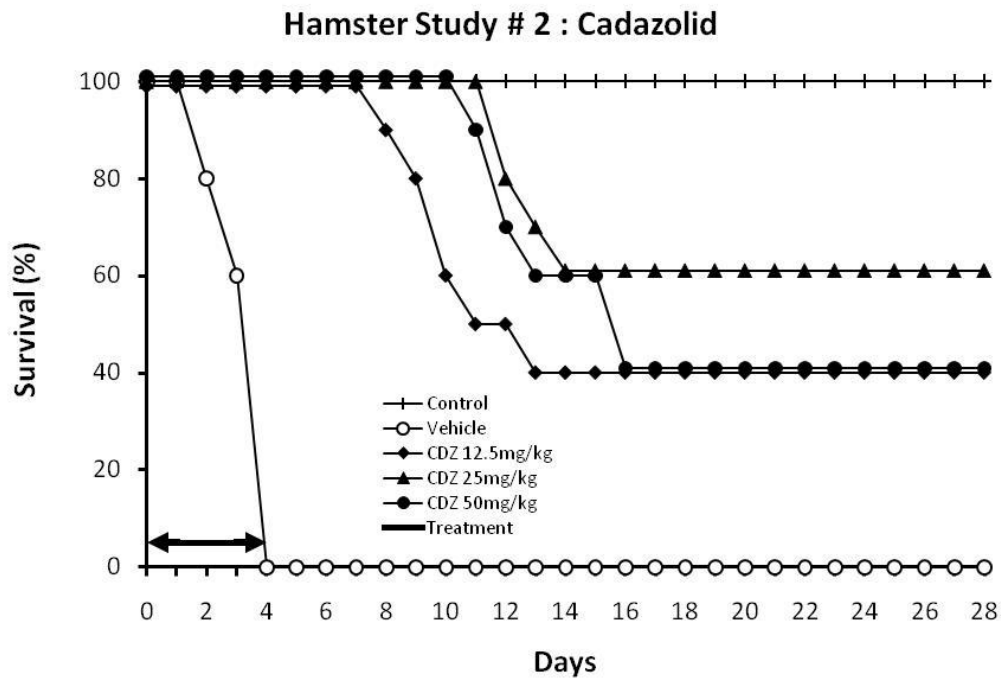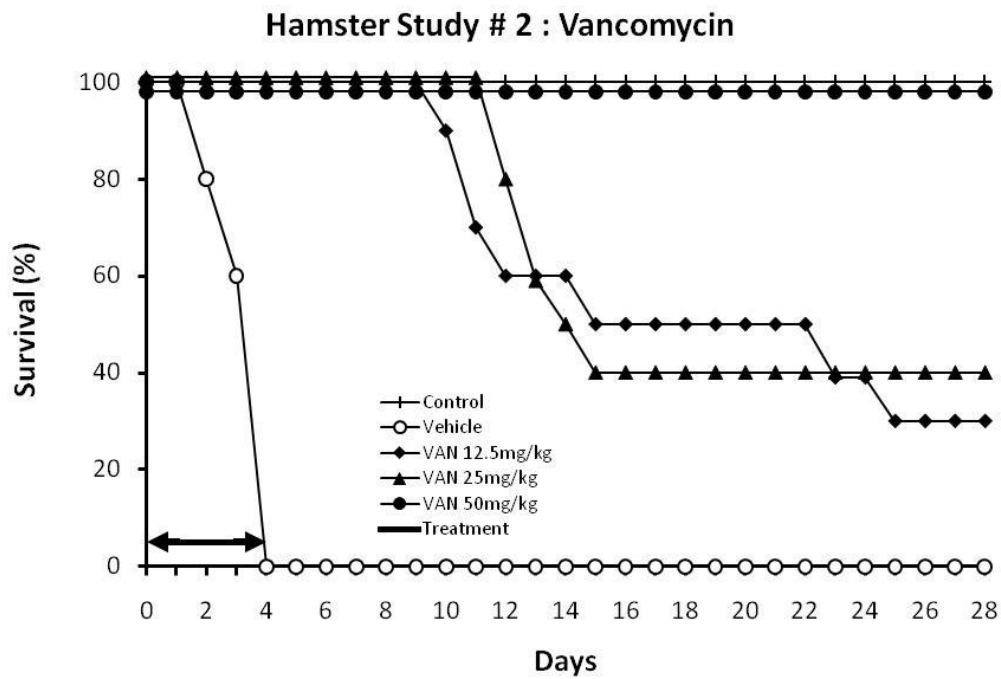

C

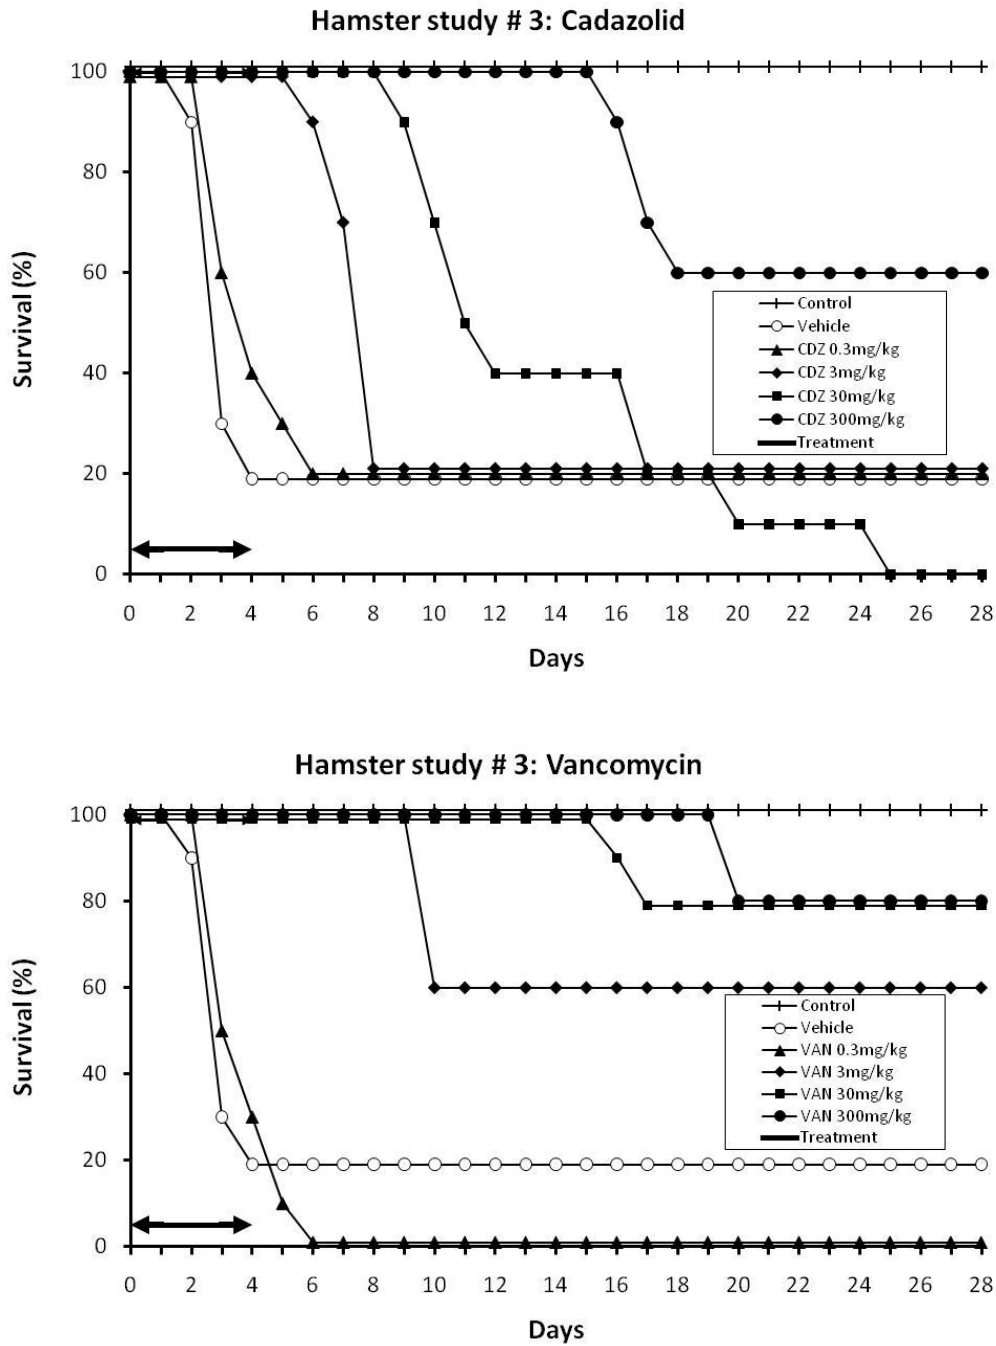

Fig S3. Efficacy in the hamster model of CDAD (A, study #1; B, study #2; C, study #3). Hamsters were infected with *C. difficile* strain VPI 10463 p.o. on day 0. Cadazolid (CDZ ) or vancomycin (VAN) was administered p.o. once daily for 4 days (10 hamster per dose group), starting 2 h post infection. Plotted is survival (% of starting group size) over time. The treatment period is marked with a black arrow.
